# Supplementary material
Source: PubMed Central journal article supplement (PMC2631555)

# Supplemental Information

## Synthesis and characterization of BODIPY-labeled colchicine

Leggy A. Arnold, Patricia Ranaivo and R. Kiplin Guy\*

**Figure 1.** Absorbance and Emission spectra for compound **1**.<sup>a</sup>

<sup>a</sup> — absorbance; --- emission; 150  $\mu$ M in Methanol; excitation filter: 450-475 nm.

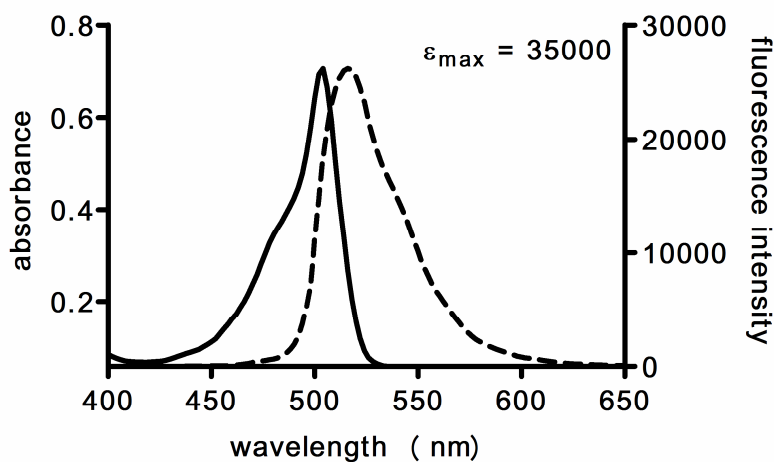

**Figure 2.** Absorbance and Emission spectra for compound **1**.<sup>a</sup>

<sup>a</sup> — absorbance; --- emission; 20  $\mu$ M in PBS/5% DMSO; excitation filter: 450-475 nm.

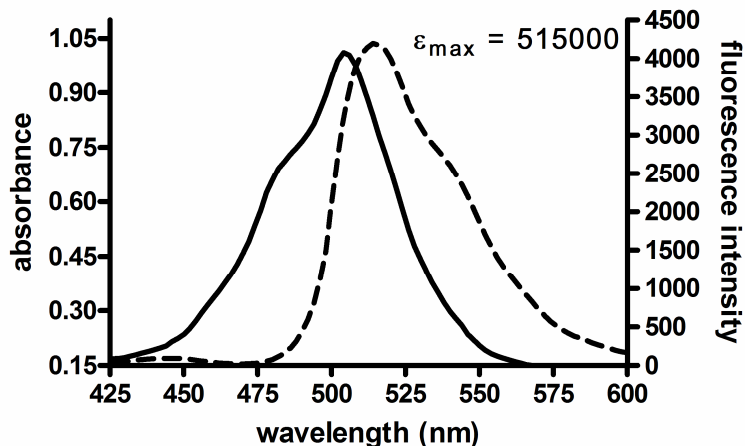

**Figure 3.** Absorbance and Emission spectra 2.<sup>a</sup>

<sup>a</sup> — absorbance; --- emission; 150  $\mu$ M in Methanol; excitation filter: 650-665 nm.

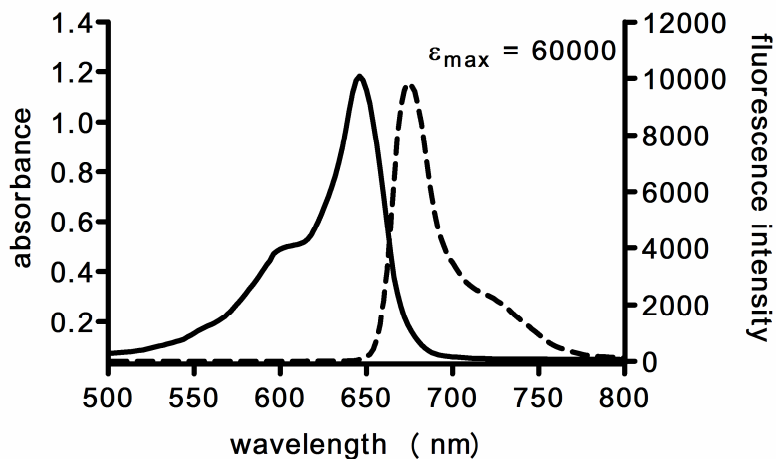

**Figure 4.** Absorbance and Emission spectra 2.<sup>a</sup>

<sup>a</sup> — absorbance; --- emission; 20  $\mu$ M in PBS/5% DMSO; excitation filter: 681-631 nm.

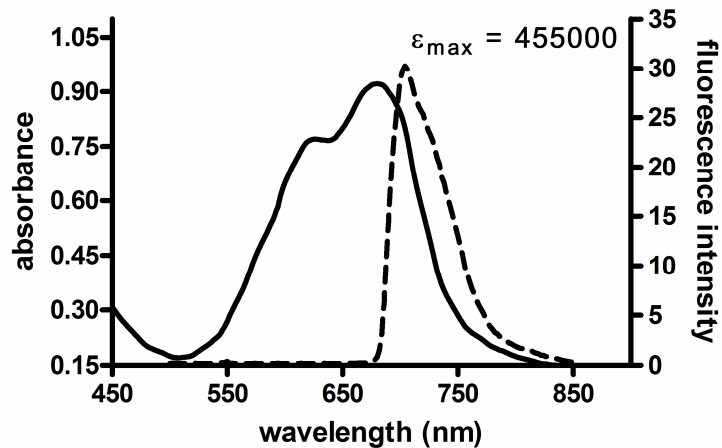

Supplement: NIHMS81388-supplement-01.pdf [file NIHMS81388-supplement-01.pdf]
